# Supplementary material for: Modularity impacts cellulose surface oxidation by a lytic polysaccharide monooxygenase from Streptomyces coelicolor
Source: Springer Nature journal article supplement (doi:10.1007/s10570-023-05551-8), 2023-10-25
Supplement: MOESM1 [file 26224532]

# **Modularity impacts cellulose surface oxidation by a lytic polysaccharide monooxygenase from *Streptomyces coelicolor***

Olanrewaju Raji<sup>1\*</sup>, Vincent G.H. Eijssink<sup>2</sup>, Emma Master<sup>1,3</sup>, and Zarah Forsberg<sup>2\*</sup>

<sup>1</sup> Department of Chemical Engineering and Applied Chemistry, University of Toronto, 200 College Street, Toronto, Ontario, M5S 3E5, Canada.

<sup>2</sup> Faculty of Chemistry, Biotechnology and Food Science, NMBU - Norwegian University of Life Sciences, 1432 Ås, Norway

<sup>3</sup> Department of Bioproducts and Biosystems, Aalto University, Kemistintie 1, 02150 Espoo, Finland.

\*Corresponding authors:

Olanrewaju Raji - Department of Chemical Engineering and Applied Chemistry, University of Toronto, 200 College Street, Toronto, Ontario, M5S 3E5, Canada. Tel: +1 6785108673. E-mail: [olan.raji@utoronto.ca](mailto:olan.raji@utoronto.ca)  
&

Zarah Forsberg - Faculty of Chemistry, Biotechnology and Food Science, NMBU - Norwegian University of Life Sciences, 1432 Ås, Norway. Tel: +47 67232469. E-mail: [zarah.forsberg@nmbu.no](mailto:zarah.forsberg@nmbu.no)

## **SUPPLEMENTARY INFORMATION**

**Figure S1. Fluorescent labeling of untreated and sulphanilic acid treated Avicel.**

**Figure S2. HPAEC-PAD analysis of LPMO activity on Avicel and SA-Avicel.**

**Figure S3. Fluorescent labeling of non-LPMO treated BMCC and SA-Avicel.**

**Figure S4. Additional images of fluorescently labeled ScAA10-treated BMCC.**

**Figure S5. Additional images of fluorescently labeled ScLPMO10C-treated BMCC.**

**Figure S6. Additional images of fluorescently labeled LPMO-treated SA-Avicel.**

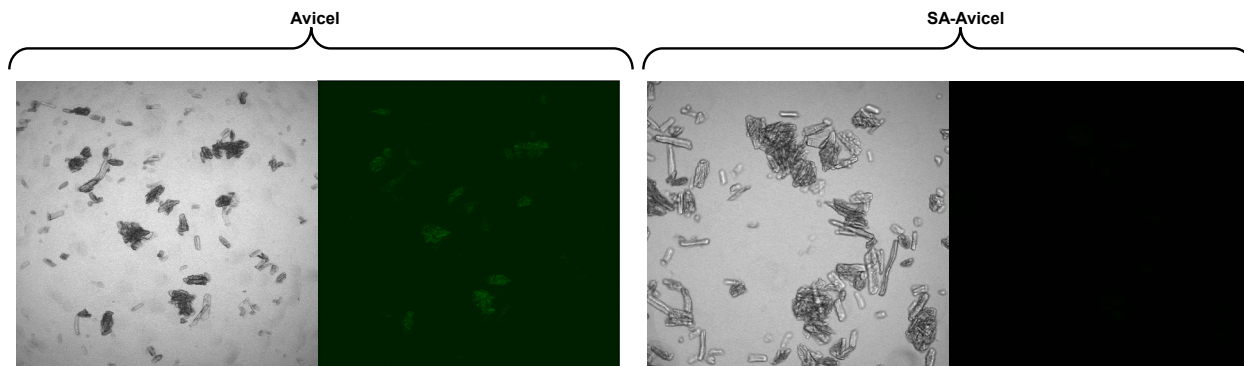

**Figure S1. Fluorescent labeling of untreated and sulphanic acid treated Avicel.** 10 g/L Avicel or SA-Avicel was labeled with fluorescent dye and visualized using a confocal microscope with 480 nm excitation and 520 nm emission wavelengths.

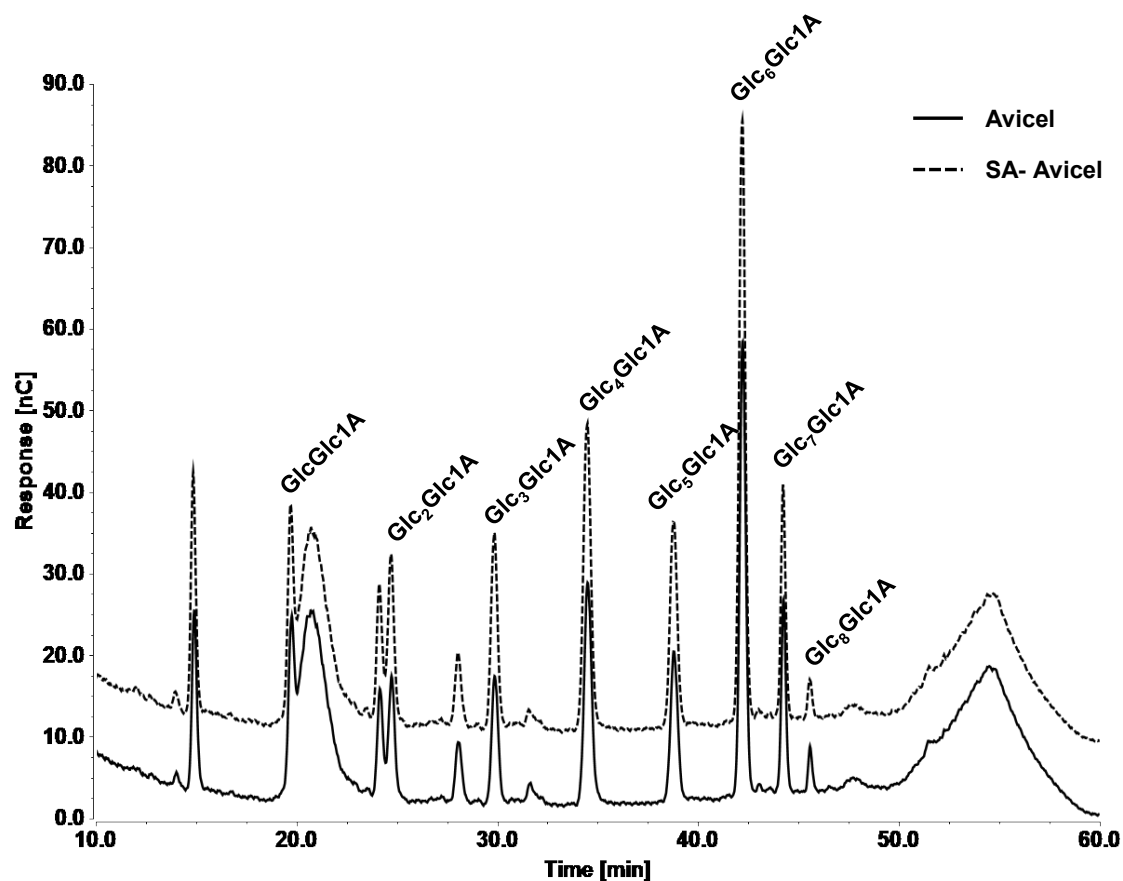

**Figure S2. HPAEC-PAD analysis of LPMO activity on Avicel and SA-Avicel.** The chromatograms show native and oxidized soluble products generated upon treating Avicel or SA-Avicel with ScLPMO10C. The activity assays were conducted using 5  $\mu$ M of ScLPMO10C, 10 g/L Avicel or SA-Avicel and 1 mM ascorbic acid in 50 mM sodium phosphate pH 6.0; the reactions were incubated for 24 h at 40  $^{\circ}$ C, with shaking at 1000 rpm, after which soluble products were analyzed by HPAEC-PAD.

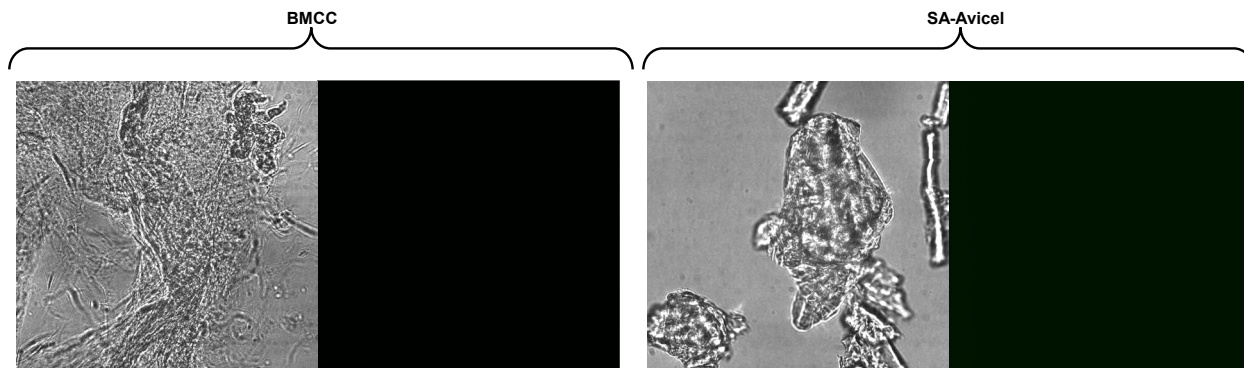

**Figure S3. Fluorescent labeling of non-LPMO treated BMCC and SA-Avicel.** 3 g/L BMCC or 10 g/L SA-Avicel was incubated in 50 mM sodium phosphate buffer (pH 6.0) at 40 °C with 1 mM of gallic acid, with 800 rpm orbital shaking for 24 h. Insoluble products were collected by centrifugation, labeled with the fluorescent dye, and visualized using a confocal microscope with 480 nm excitation and 520 nm emission wavelengths.

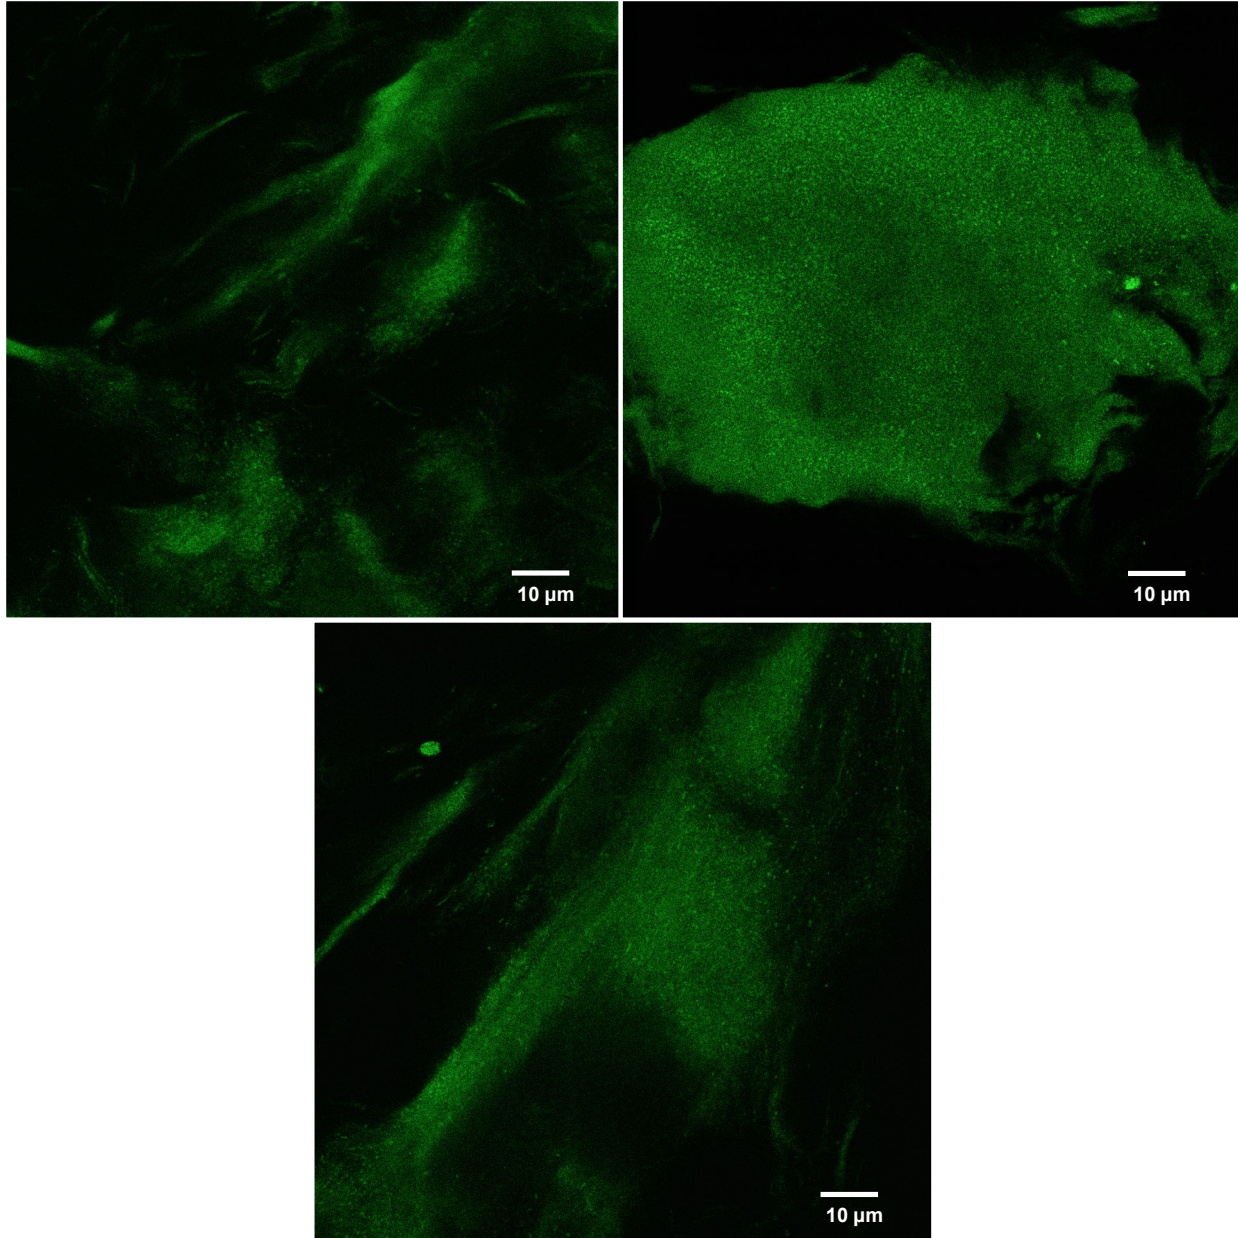

**Figure S4. Additional images of fluorescently labeled *ScAA10*-treated BMCC.** 3 g/L BMCC was incubated in 50 mM sodium phosphate buffer (pH 6.0) at 40 °C with 1 μM LPMO *ScAA10* and 1 mM of gallic acid, with 800 rpm orbital shaking for 24 h. Insoluble products were collected by centrifugation, labeled with the fluorescent dye, and visualized using a confocal microscope with 480 nm excitation and 520 nm emission wavelengths.

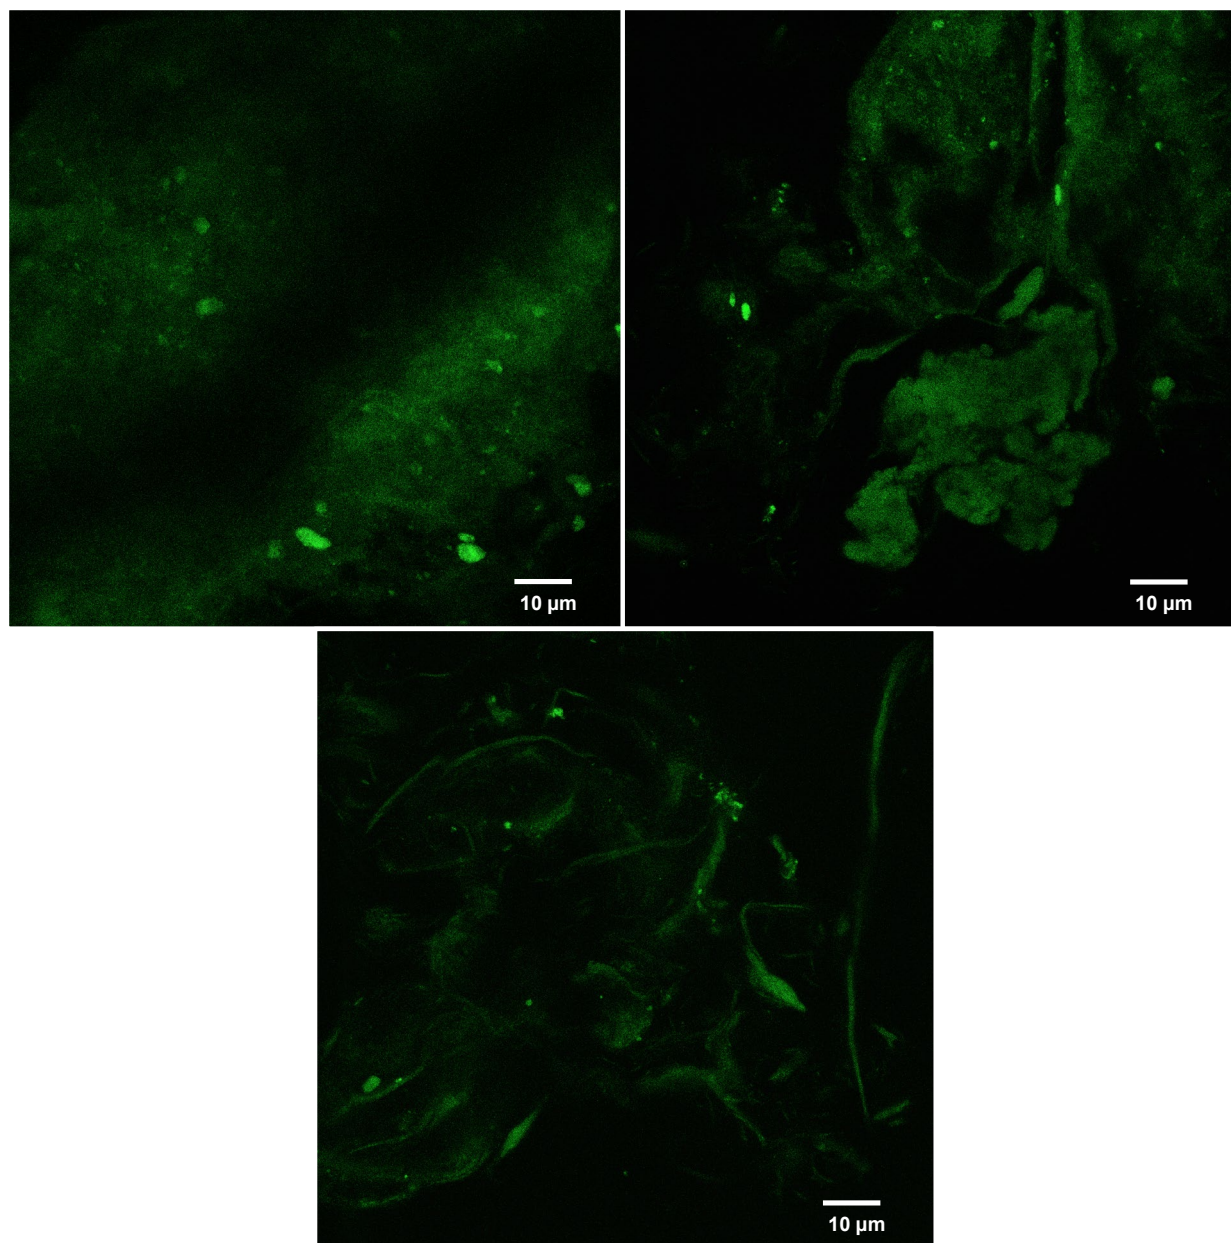

**Figure S5. Additional images of fluorescently labeled ScLPMO10C-treated BMCC.** 3 g/L BMCC was incubated in 50 mM sodium phosphate buffer (pH 6.0) at 40 °C with 1 μM LPMO ScLPMO10C and 1 mM of gallic acid, with 800 rpm orbital shaking for 24 h. Insoluble products were collected by centrifugation, labeled with the fluorescent dye, and visualized using a confocal microscope with 480 nm excitation and 520 nm emission wavelengths.

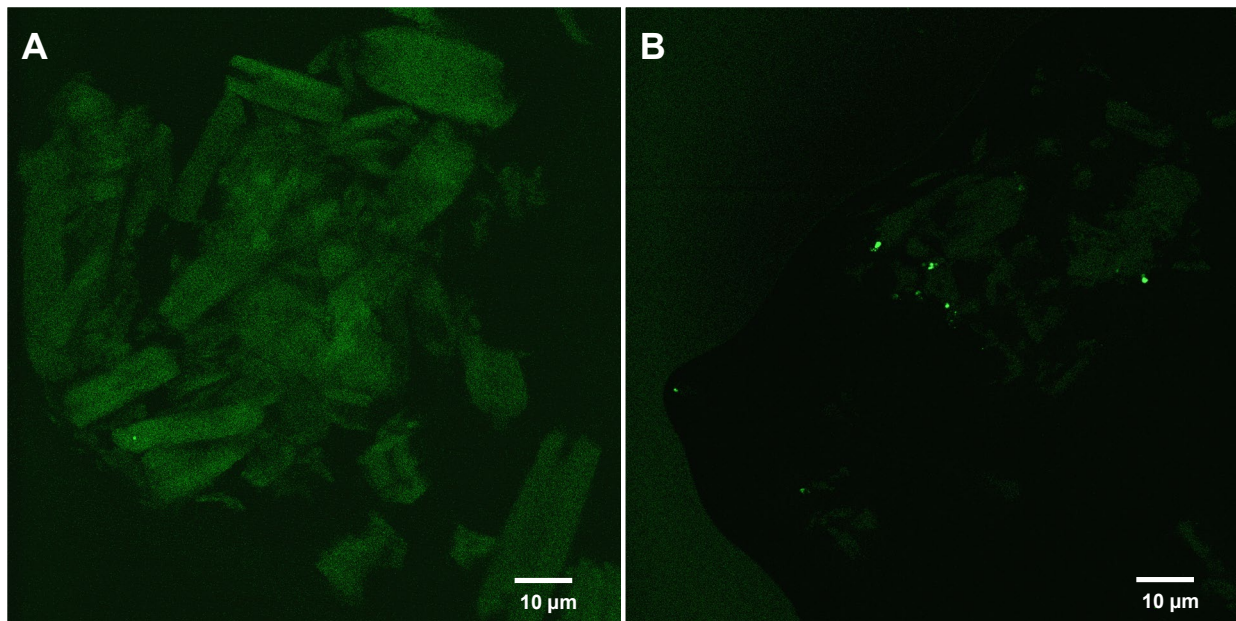

**Figure S6. Additional images of fluorescently labeled LPMO-treated SA-Avicel.** 10 g/L SA-Avicel was incubated in 50 mM sodium phosphate buffer (pH 6.0) at 40 °C with 1 µM LPMO ScAA10 (A) or SclPMO10C (B) and 1 mM of gallic acid, with 800 rpm orbital shaking for 24 h. Insoluble products were collected by centrifugation, labeled with the fluorescent dye, and visualized using a confocal microscope with 480 nm excitation and 520 nm emission wavelengths.
